# Supplementary material for: Synthesis of and molecular dynamics simulations on a tetrasaccharide corresponding to the repeating unit of the capsular polysaccharide from Salmonella enteritidis
Source: Royal Society of Chemistry journal article supplement (doi:10.1039/b823428k), 2009-01-01
Supplement: b823428k.pdf [file b823428k.pdf]

# Synthesis of and molecular dynamics simulations on a tetrasaccharide corresponding to the repeating unit of the capsular polysaccharide from *Salmonella enteritidis*

Johan D. M. Olsson,<sup>a</sup> Jens Landström,<sup>a</sup> Jerk Rönnols,<sup>a</sup> Stefan Oscarson<sup>a,b</sup> and Göran Widmalm\*<sup>a</sup>

<sup>a</sup> Department of Organic Chemistry, Arrhenius Laboratory, Stockholm University, S-106 91 Stockholm, Sweden. E-mail: gw@organ.su.se

<sup>b</sup> Centre for Synthesis and Chemical Biology, University College Dublin, Belfield, Dublin 4, Ireland.

## Supporting information

### Table of contents

|                                                                                                                                    |              |
|------------------------------------------------------------------------------------------------------------------------------------|--------------|
| <sup>13</sup> C and <sup>1</sup> H NMR spectra of compounds <b>2</b> , <b>4</b> , <b>5</b> , <b>7</b> , <b>9</b> – <b>17</b> ..... | page S2-S14  |
| <sup>1</sup> H and <sup>13</sup> C NMR chemical shift assignments and spectra of <b>13</b> and <b>17</b> .....                     | page S15-S16 |

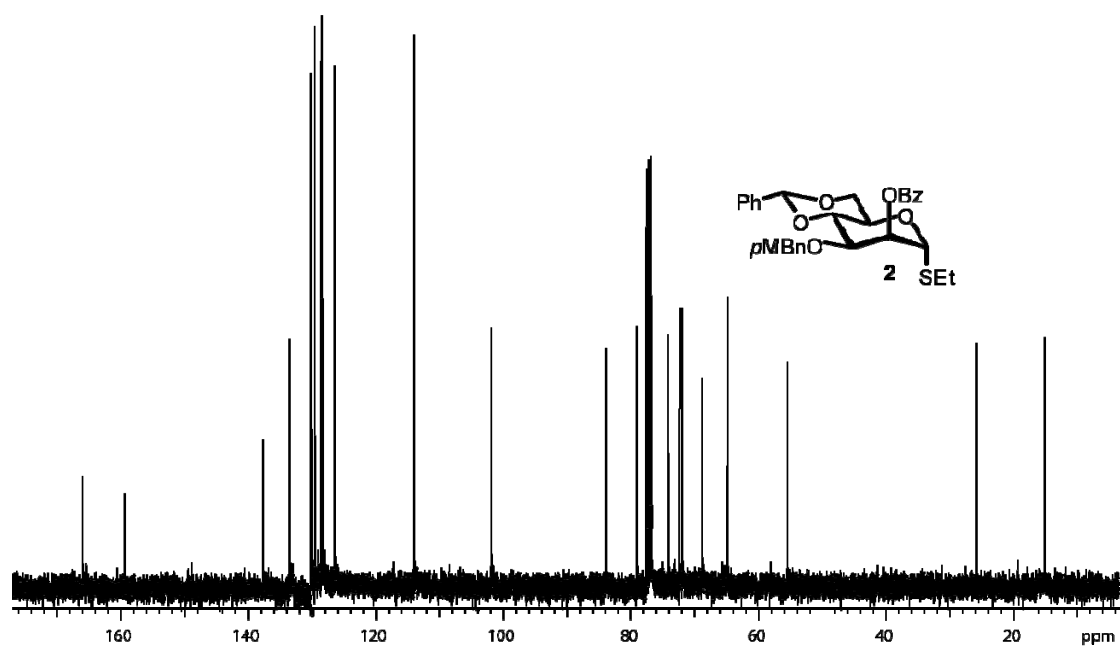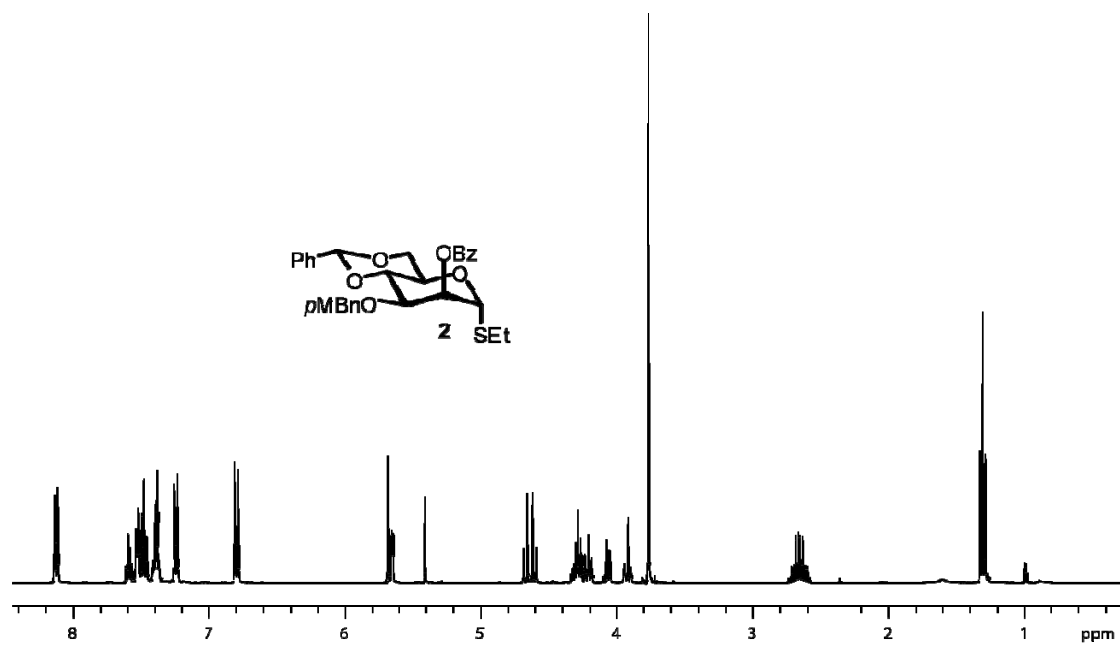

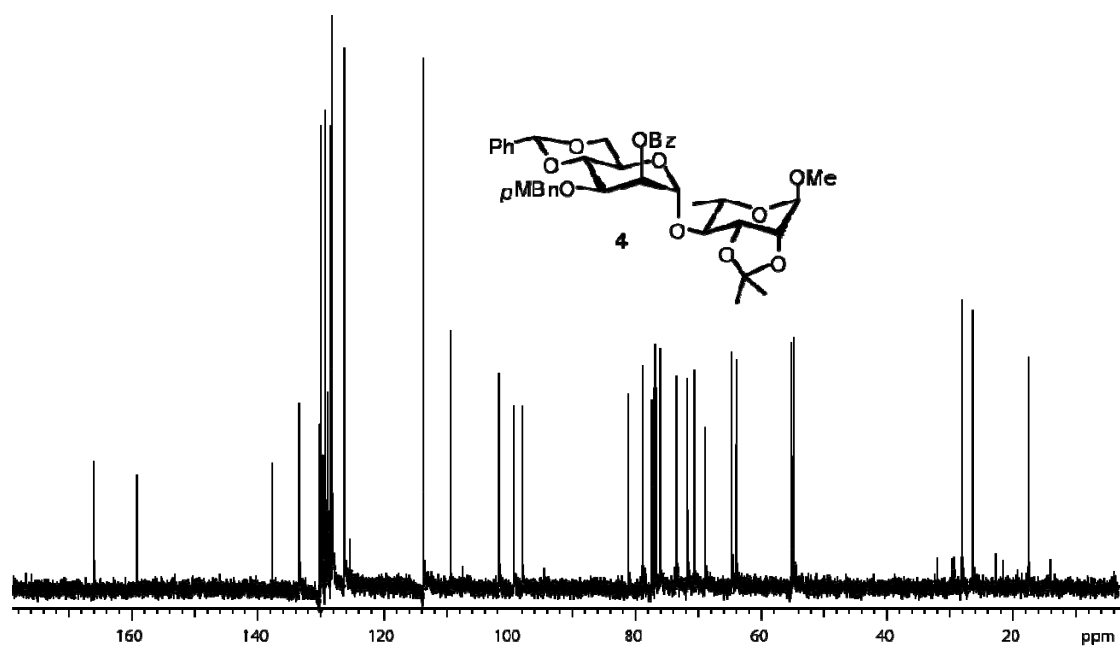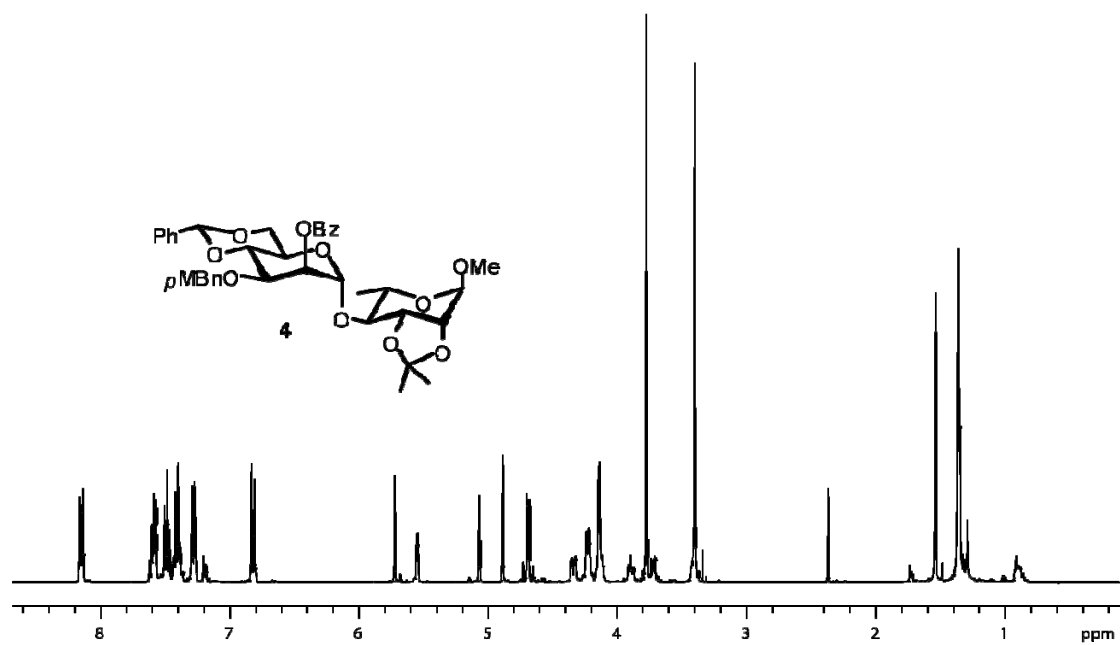

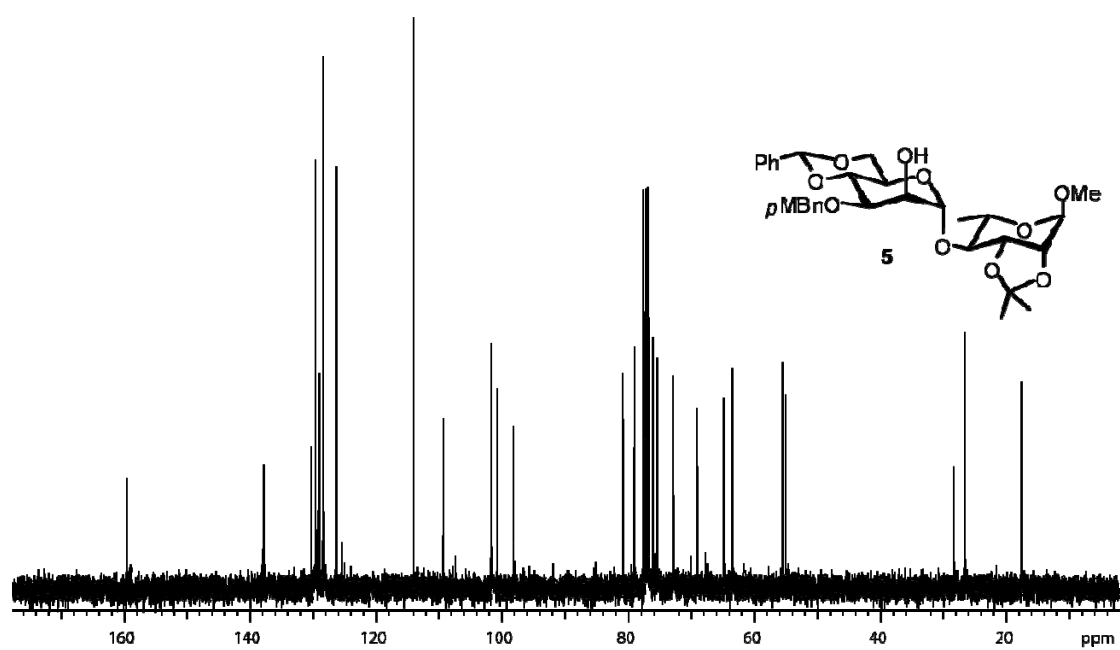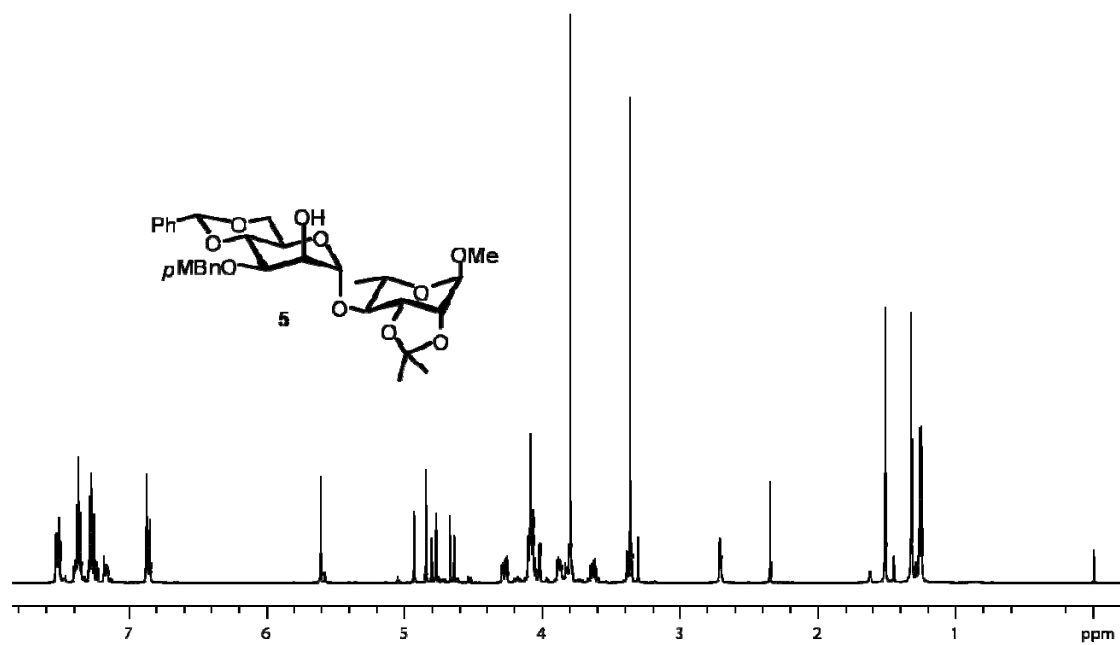

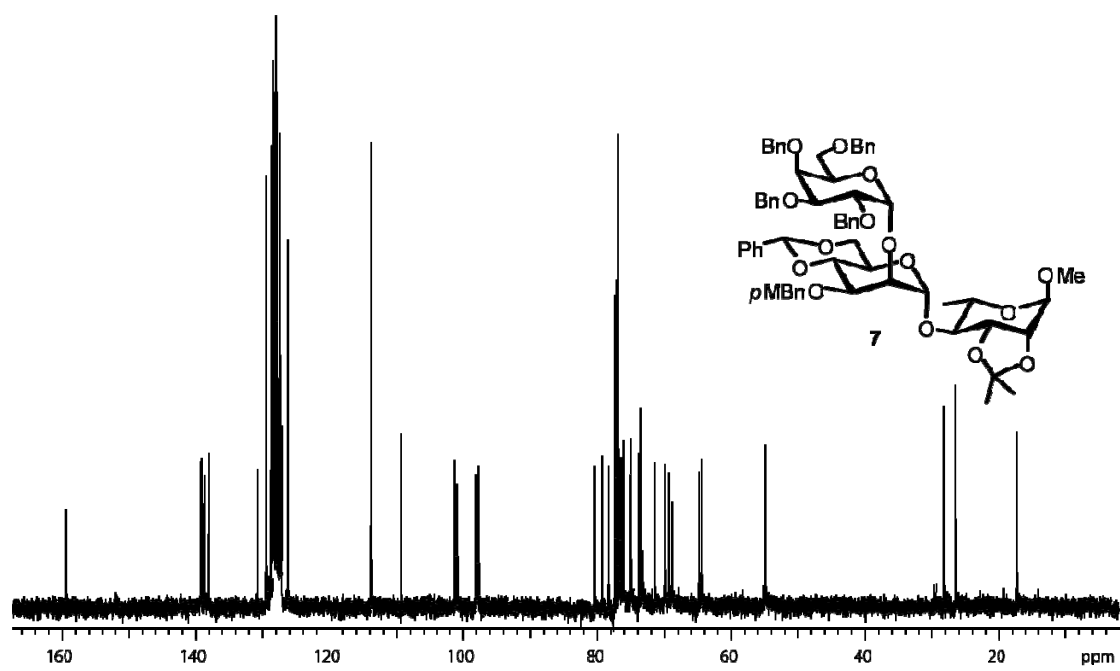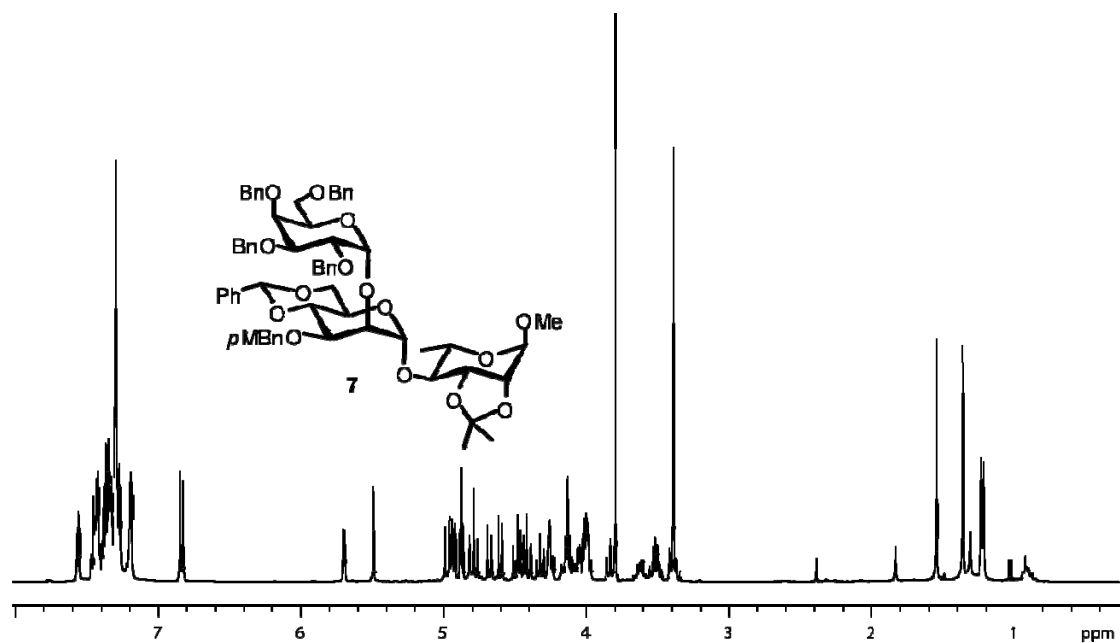

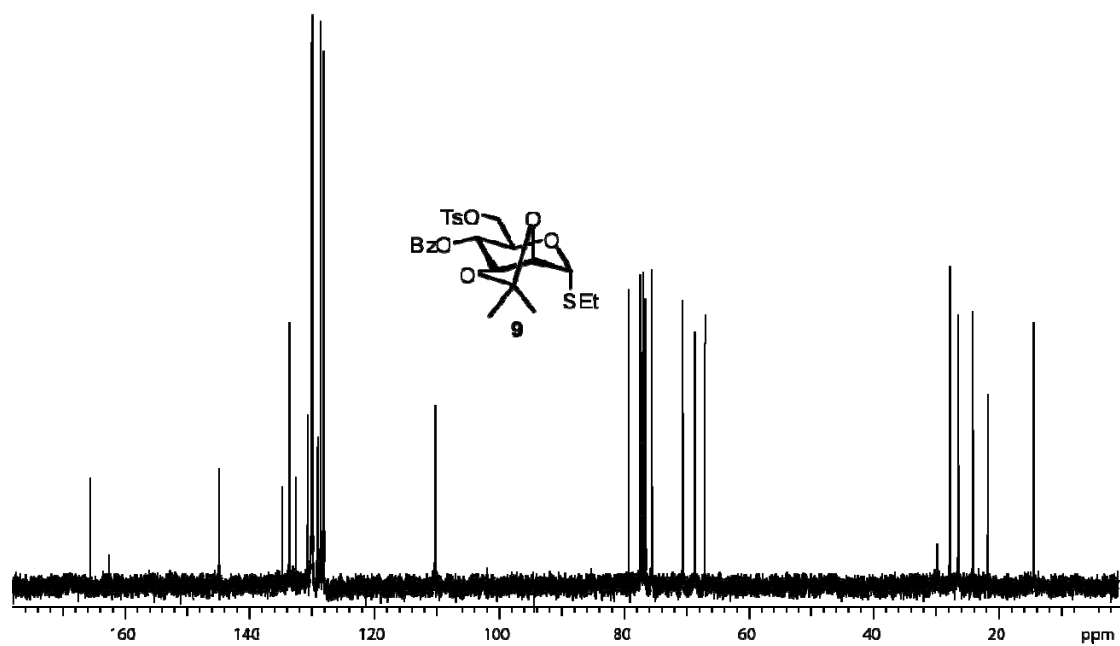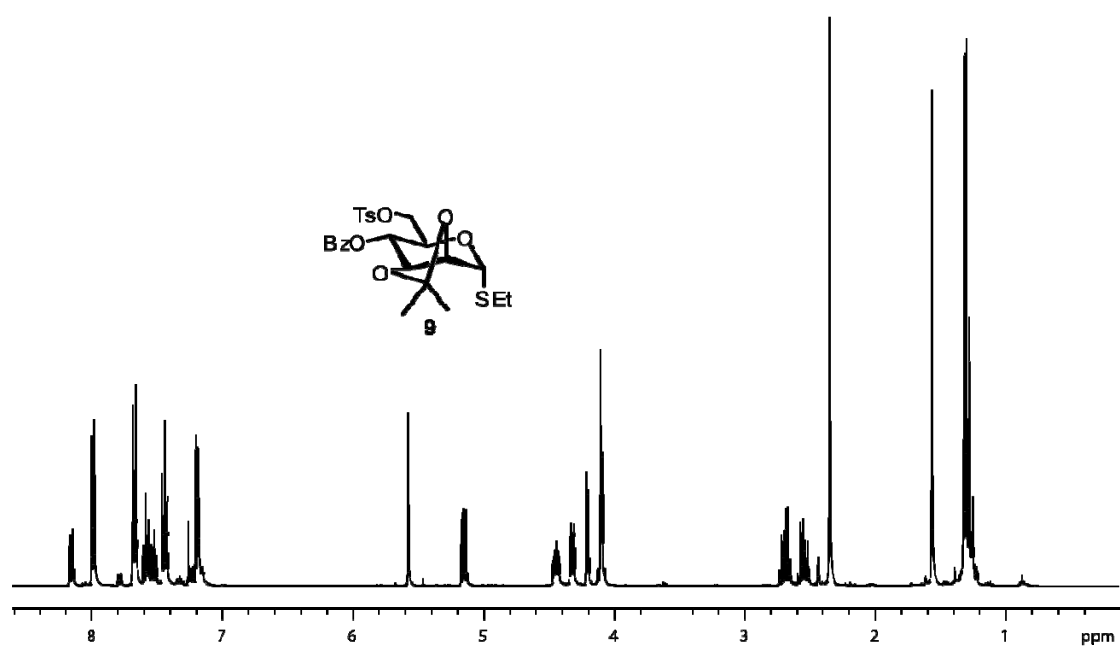

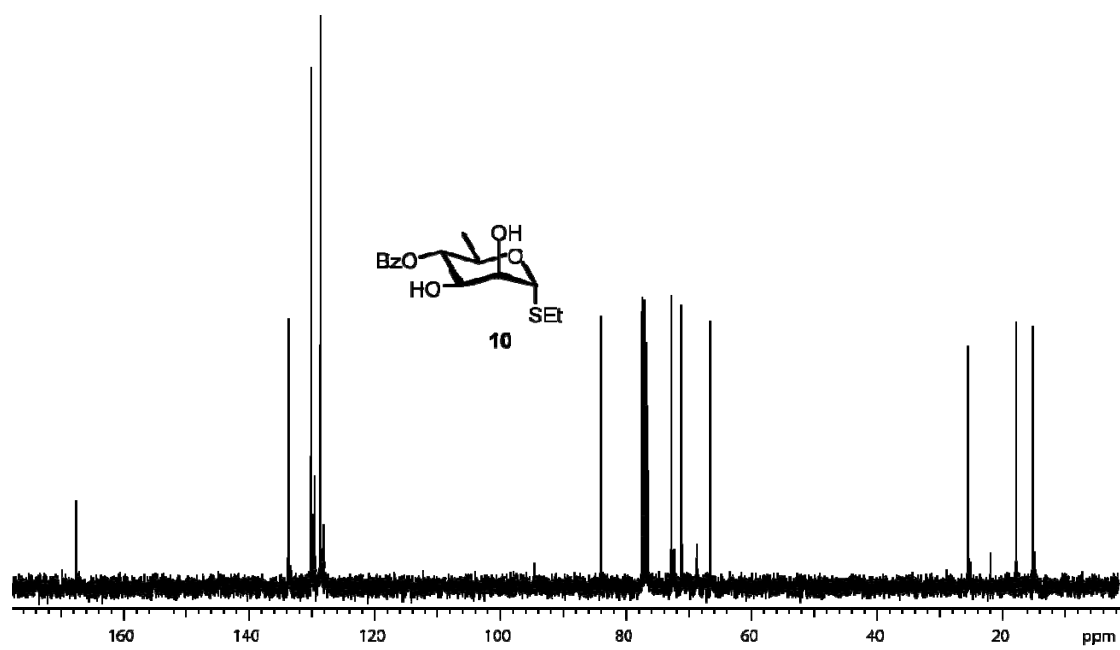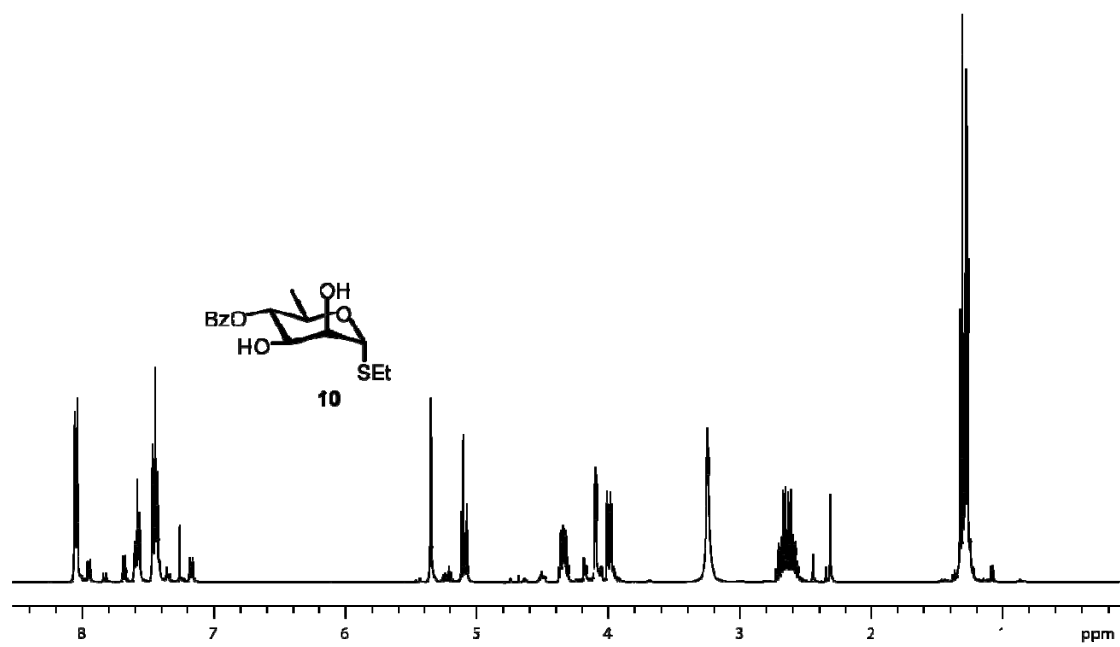

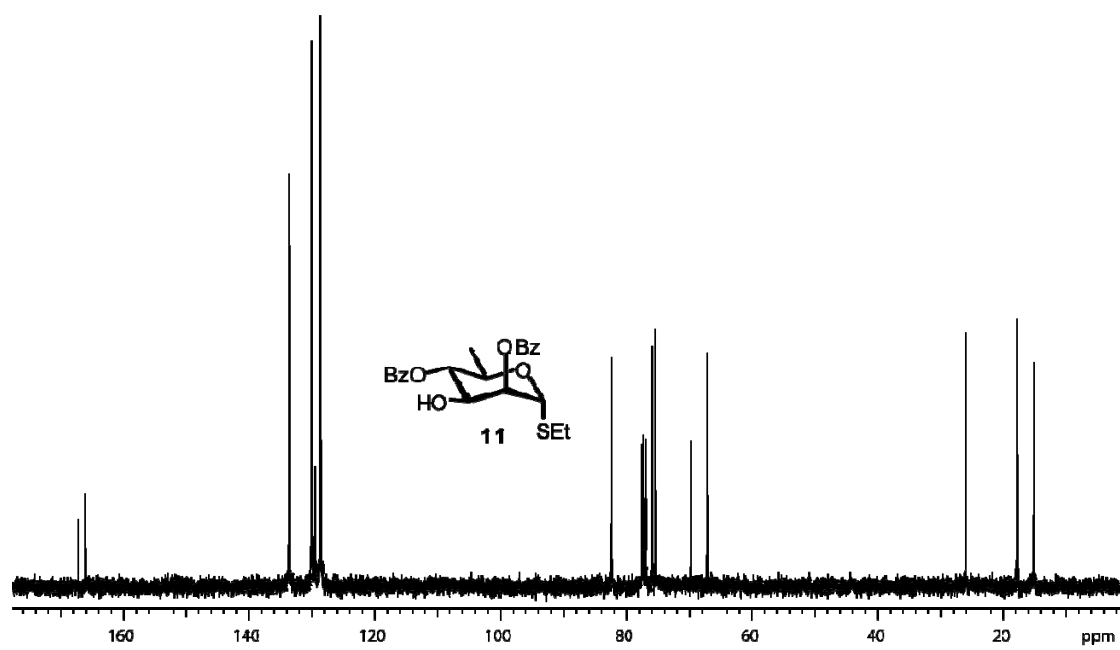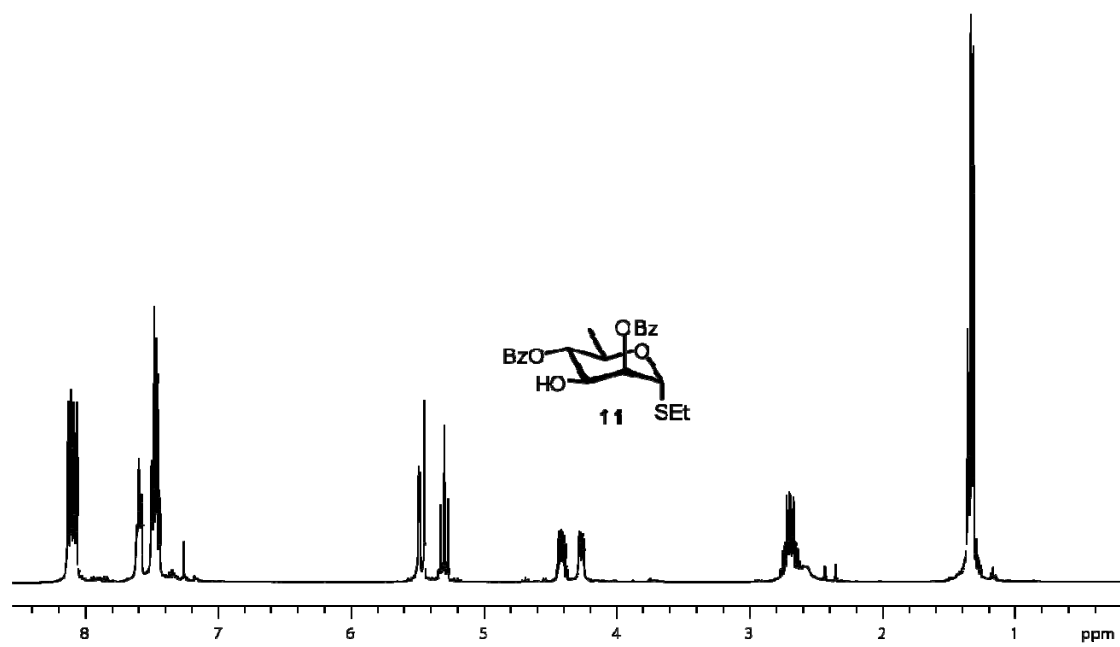



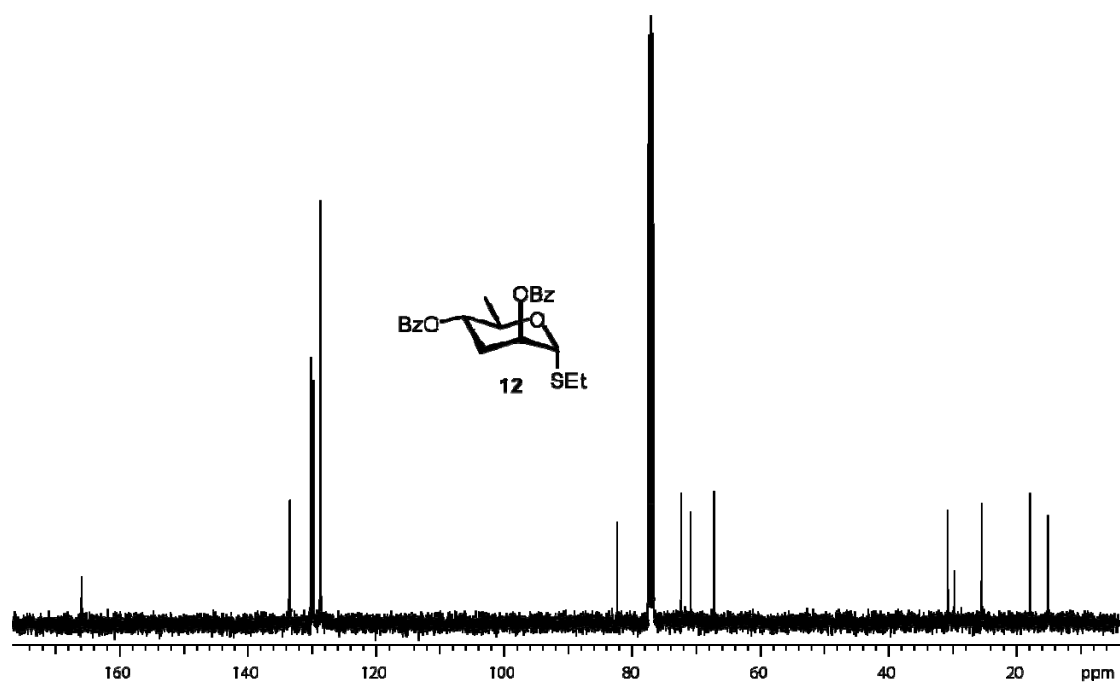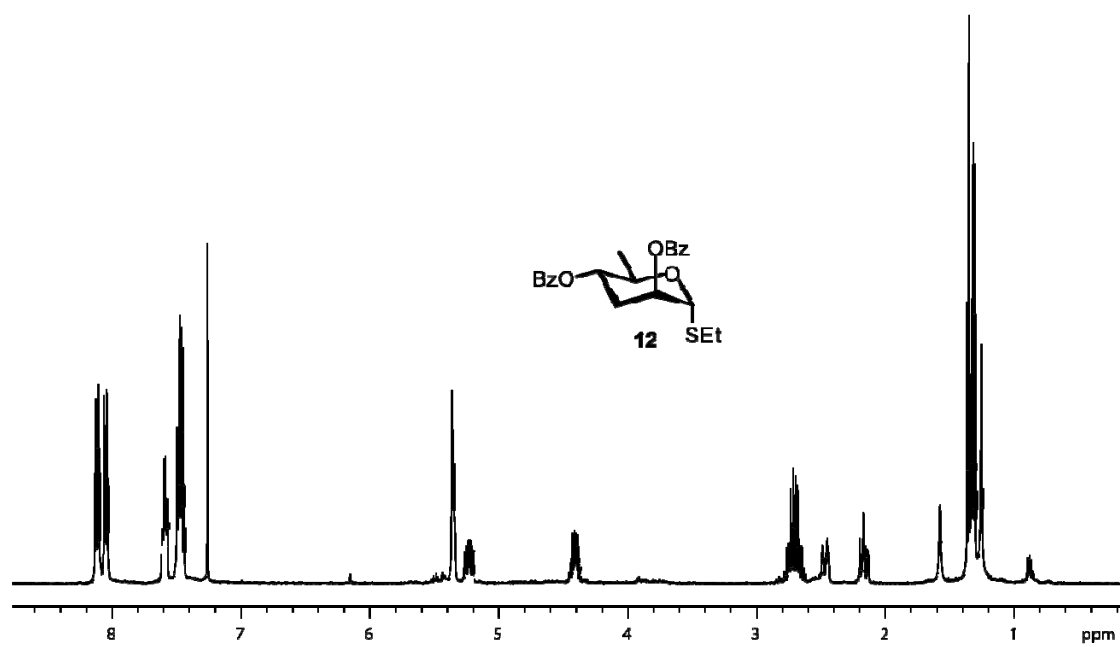

343 K

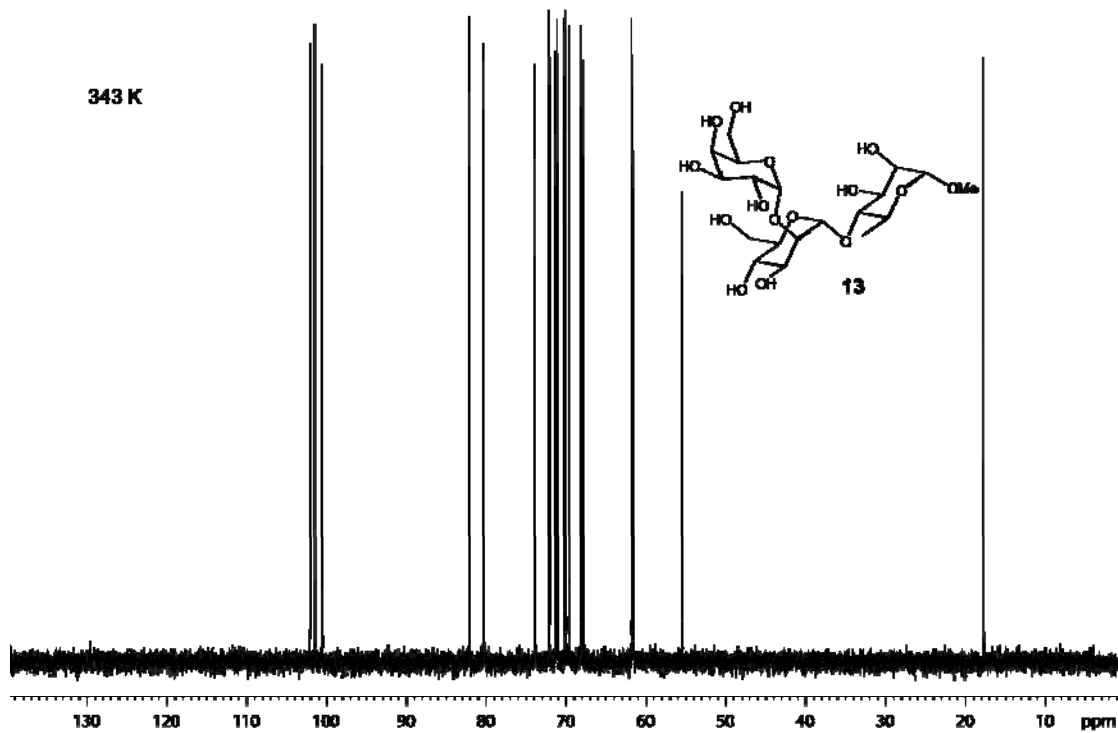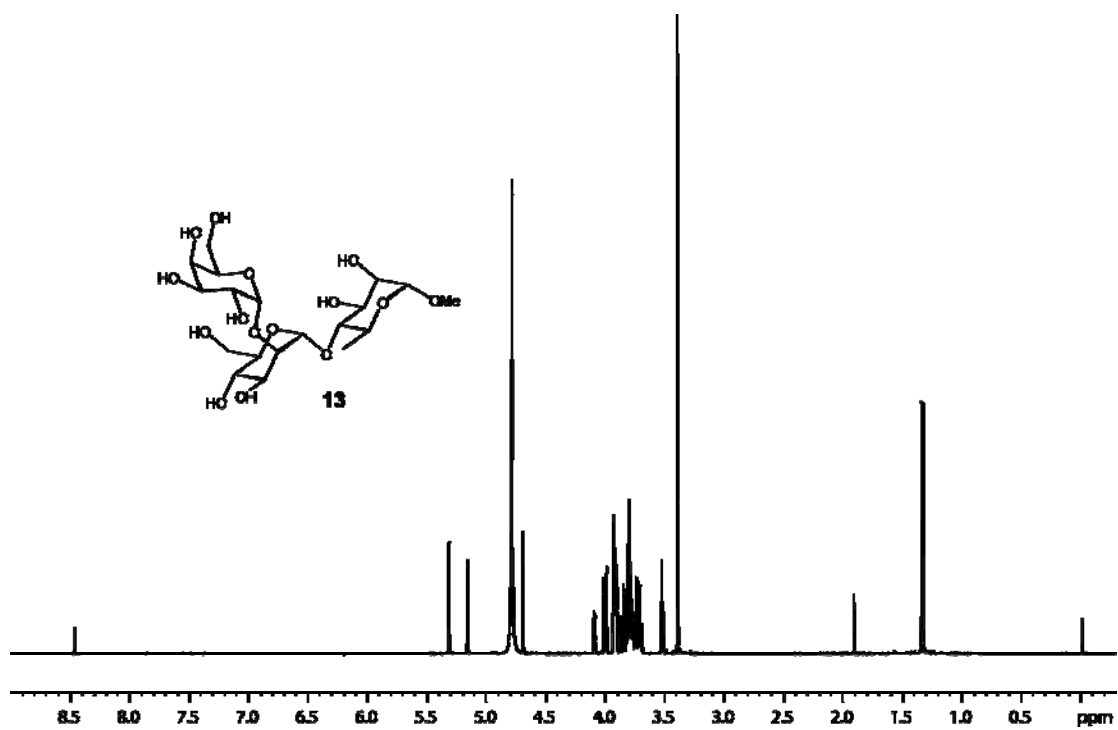

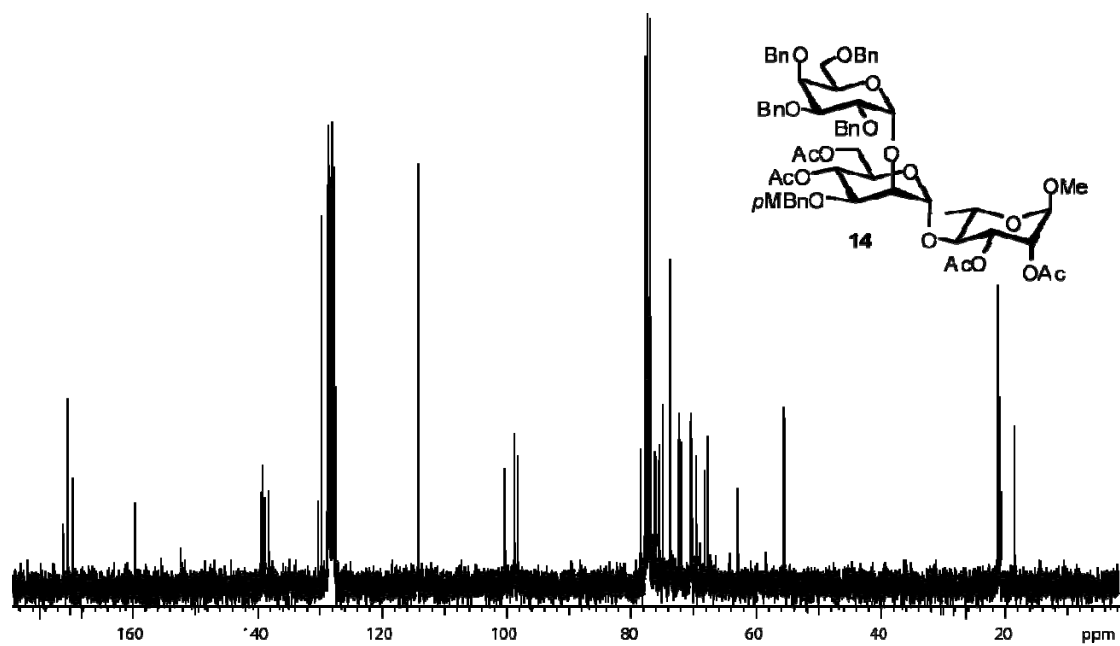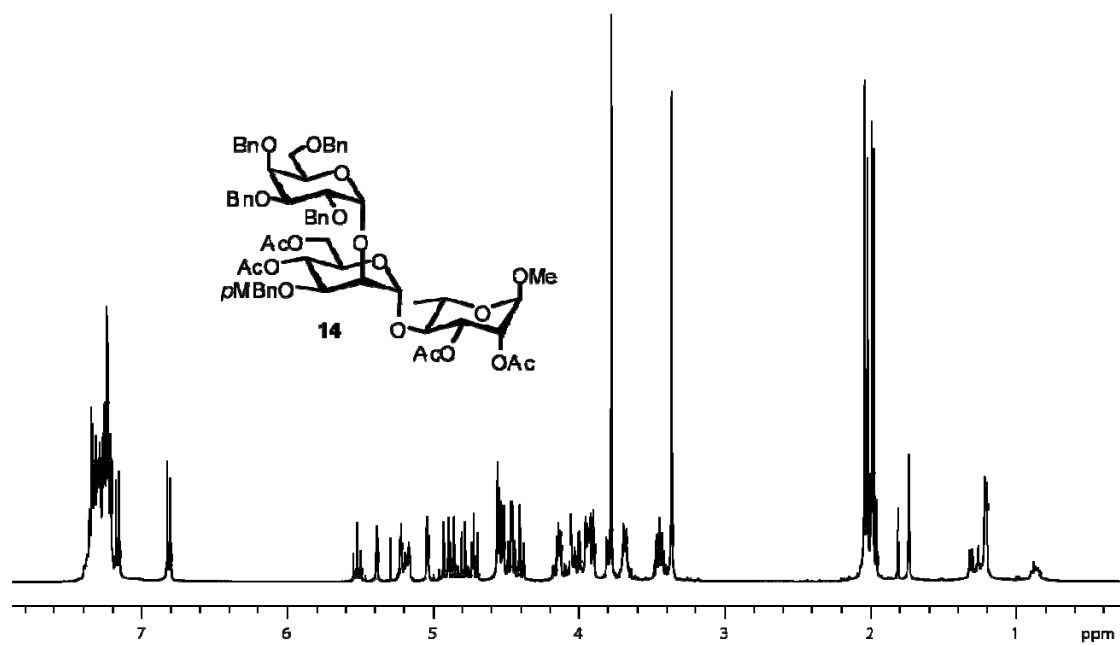

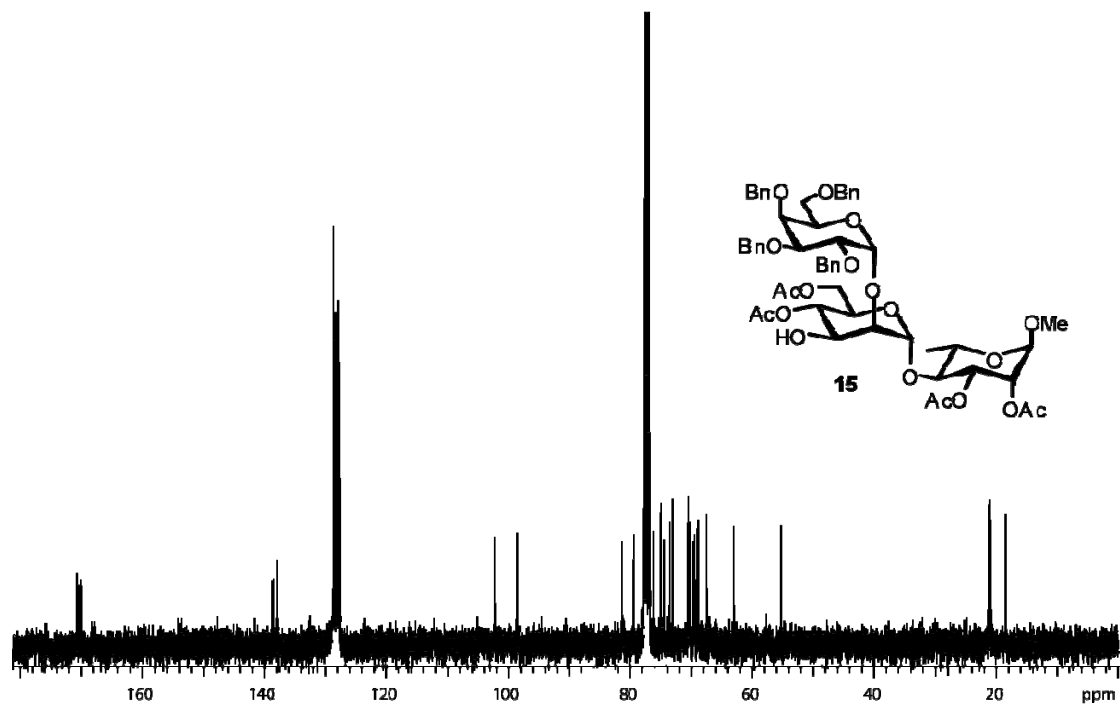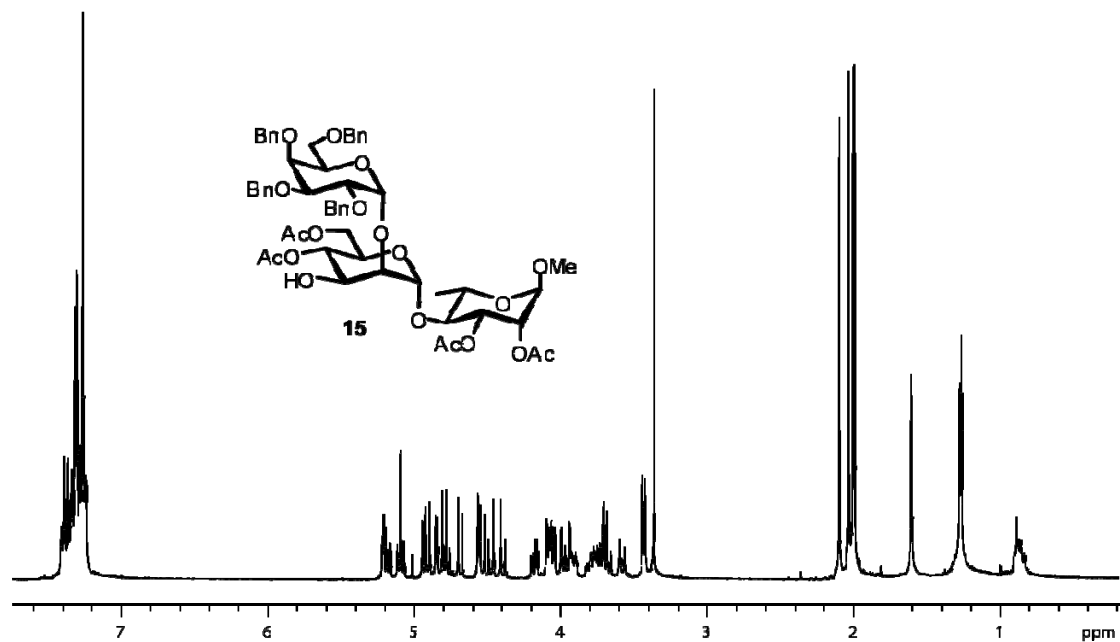

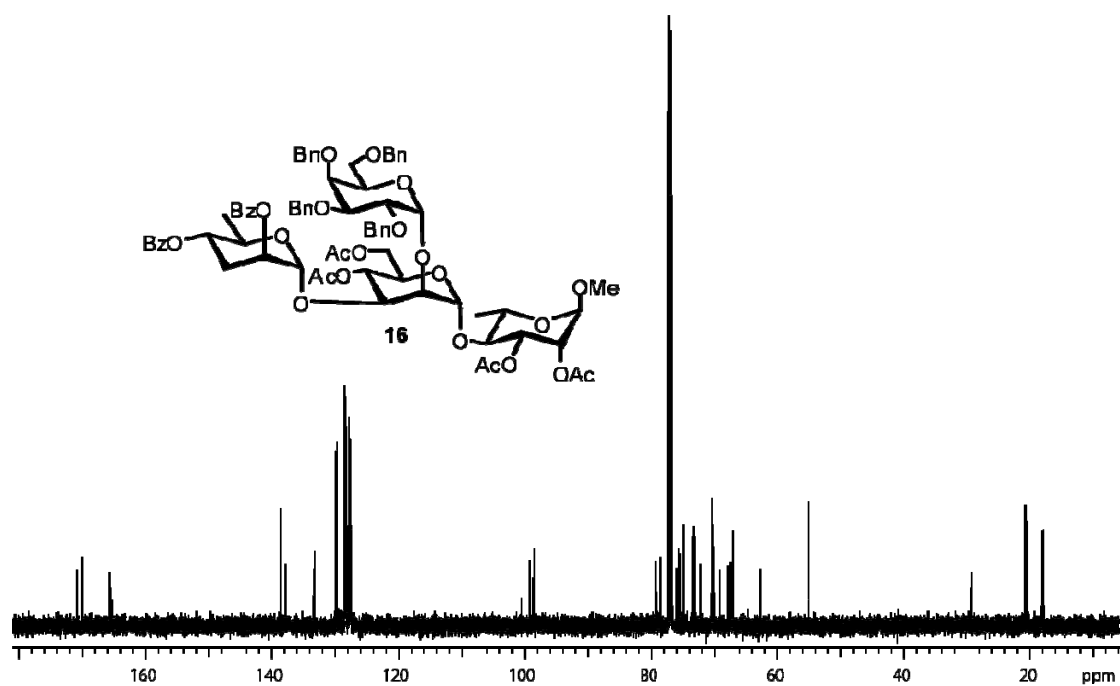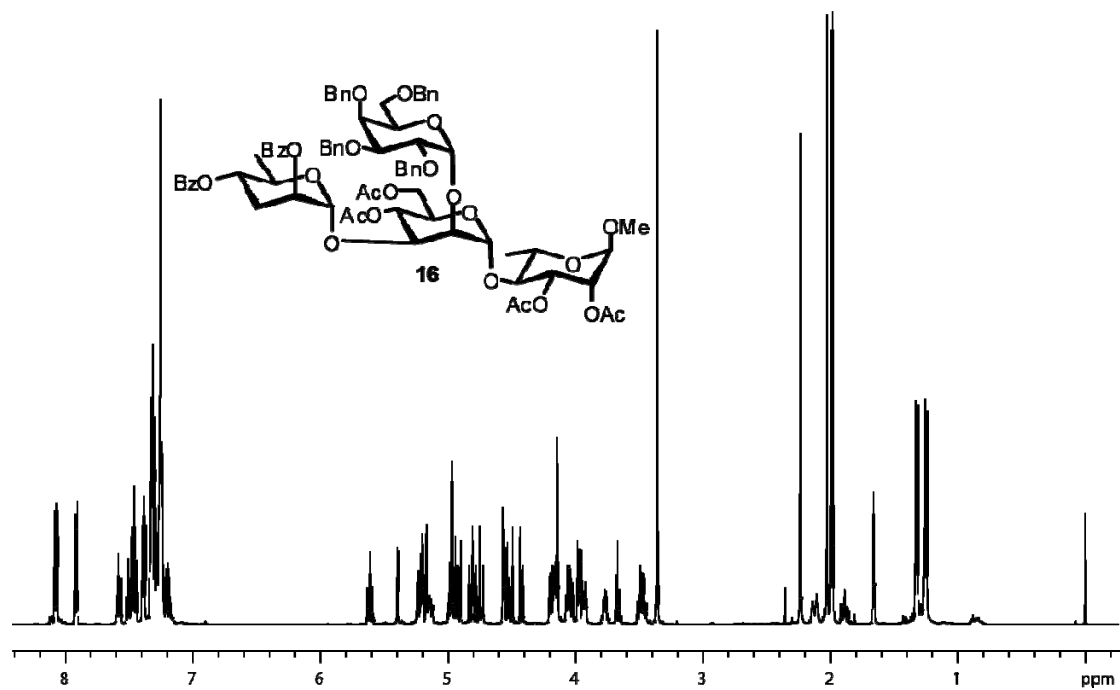

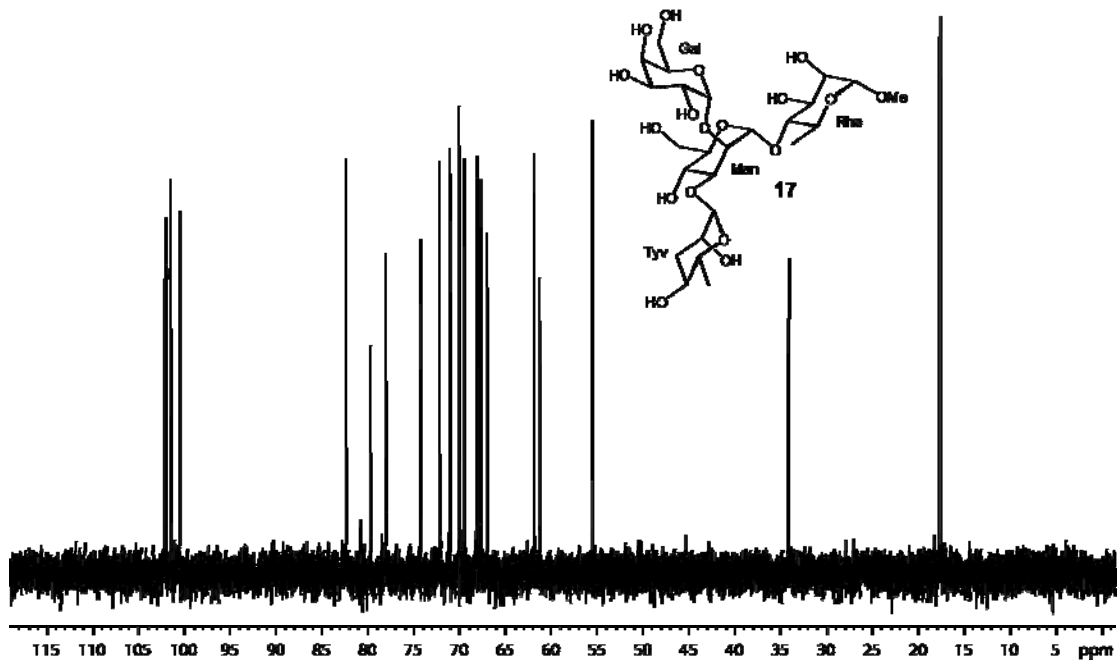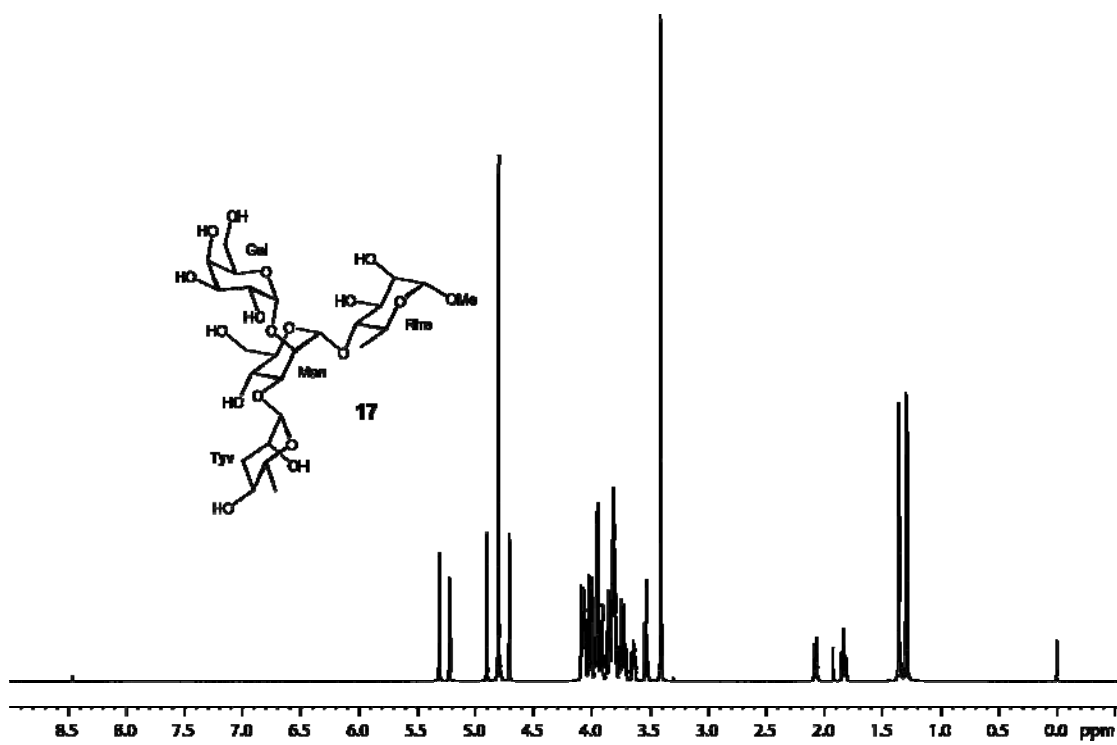

## $^1\text{H}$ and $^{13}\text{C}$ NMR chemical shift assignments and spectra

Table S1.  $^1\text{H}$  and  $^{13}\text{C}$  NMR chemical shifts and  $J_{\text{H,H}}$  coupling constants in parenthesis of trisaccharide **13** in  $\text{D}_2\text{O}$  at 298 K.

| Sugar | 1          | 2           | 3          | 4           | 5               | 6R/S               | OMe  |
|-------|------------|-------------|------------|-------------|-----------------|--------------------|------|
| Gal   | 5.16 (3.9) | 3.83 (10.5) | 3.92 (3.4) | 4.00 (1.1)  | 4.10 (8.0, 4.3) | 3.71, 3.75 (-11.8) |      |
|       | 102.2      | 69.6        | 70.0       | 70.1        | 72.2            | 61.9               |      |
| Man   | 5.32 (1.9) | 4.02 (3.3)  | 3.92 (9.8) | 3.81 (10.0) | 3.93 (5.1, 2.4) | 3.80, 3.86 (-12.4) |      |
|       | 100.5      | 80.6        | 71.3       | 67.6        | 73.8            | 61.3               |      |
| Rha   | 4.70 (1.8) | 3.94 (3.5)  | 3.81 (9.4) | 3.53 (9.5)  | 3.78 (6.3)      | 1.35               | 3.40 |
|       | 101.4      | 71.1        | 69.8       | 82.1        | 68.2            | 17.9               | 55.5 |

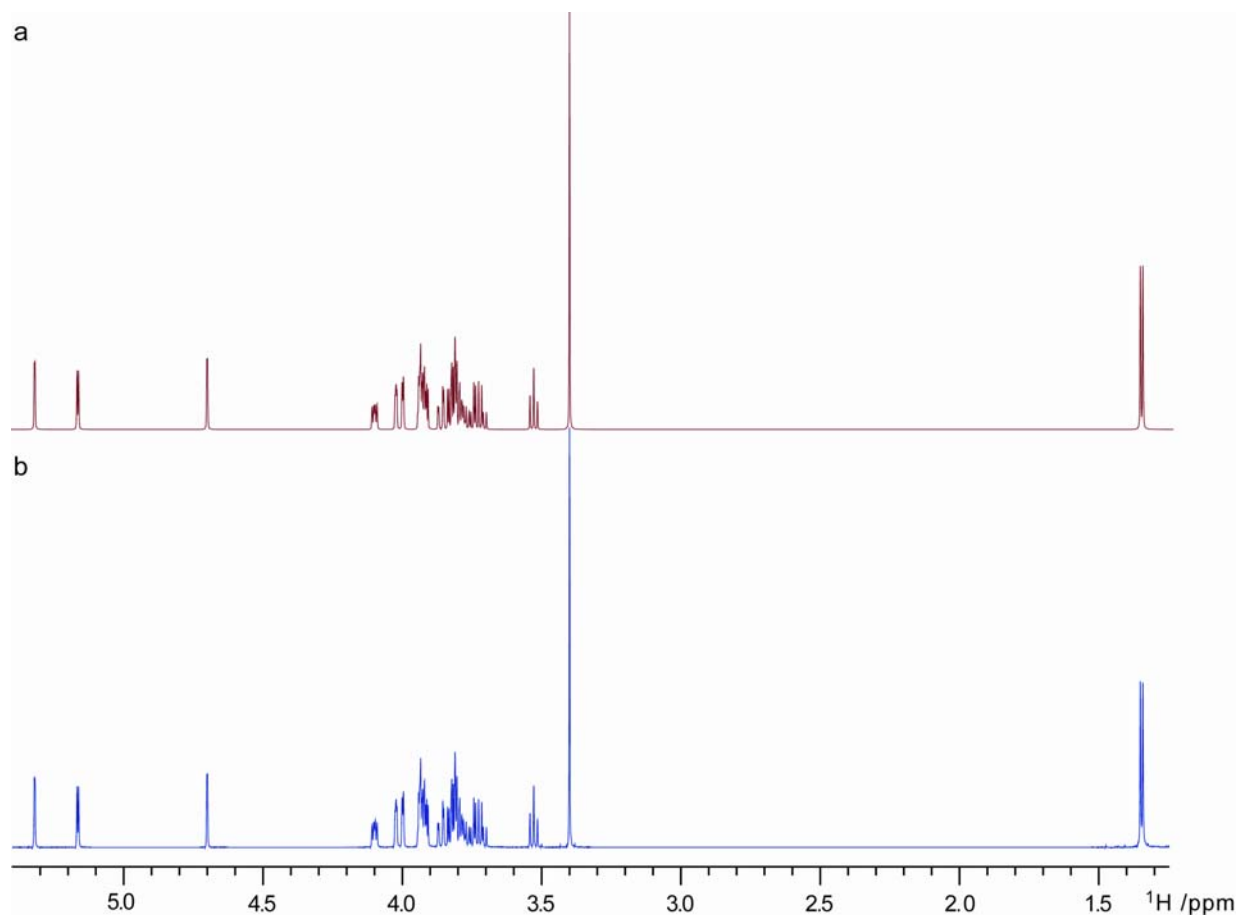

Figure S1.  $^1\text{H}$  NMR spectra at 700 MHz of trisaccharide **13** from (a) simulation using PERCH and (b) experiment (prepared for PERCH analysis, e.g. solvent peak removed).

Table S2.  $^1\text{H}$  and  $^{13}\text{C}$  NMR chemical shifts and  $J_{\text{H,H}}$  coupling constants in parenthesis of tetrasaccharide **17** in  $\text{D}_2\text{O}$  at 298 K.

| Sugar | 1          | 2                  | 3                                             | 4           | 5                  | 6R/S                  | OMe  |
|-------|------------|--------------------|-----------------------------------------------|-------------|--------------------|-----------------------|------|
| Gal   | 5.22 (4.0) | 3.81 (10.4)        | 3.91 (3.4)                                    | 4.00 (1.1)  | 4.07<br>(8.0, 4.3) | 3.72, 3.75<br>(-11.9) |      |
|       | 101.9      | 69.5               | 70.1                                          | 70.1        | 72.2               | 61.9                  |      |
| Man   | 5.31 (2.0) | 4.02 (3.0)         | 4.06 (9.7)                                    | 3.95 (10.2) | 3.96<br>(4.7, 2.2) | 3.81, 3.86<br>(-12.3) |      |
|       | 100.5      | 79.7               | 78.1                                          | 67.0        | 74.2               | 61.3                  |      |
| Rha   | 4.71 (1.8) | 3.95 (3.5)         | 3.84 (9.4)                                    | 3.53 (9.5)  | 3.80 (6.3)         | 1.35                  | 3.40 |
|       | 101.4      | 71.1               | 70.0                                          | 82.4        | 68.1               | 17.9                  | 55.5 |
| Tyv   | 4.90 (1.6) | 4.09<br>(3.2, 3.0) | 2.07 (eq)<br>(-13.6, 4.5)<br>1.83 (ax) (11.5) | 3.64 (9.3)  | 3.80 (6.3)         | 1.29                  |      |
|       | 102.1      | 68.1               | 34.2                                          | 67.7        | 71.1               | 17.6                  |      |

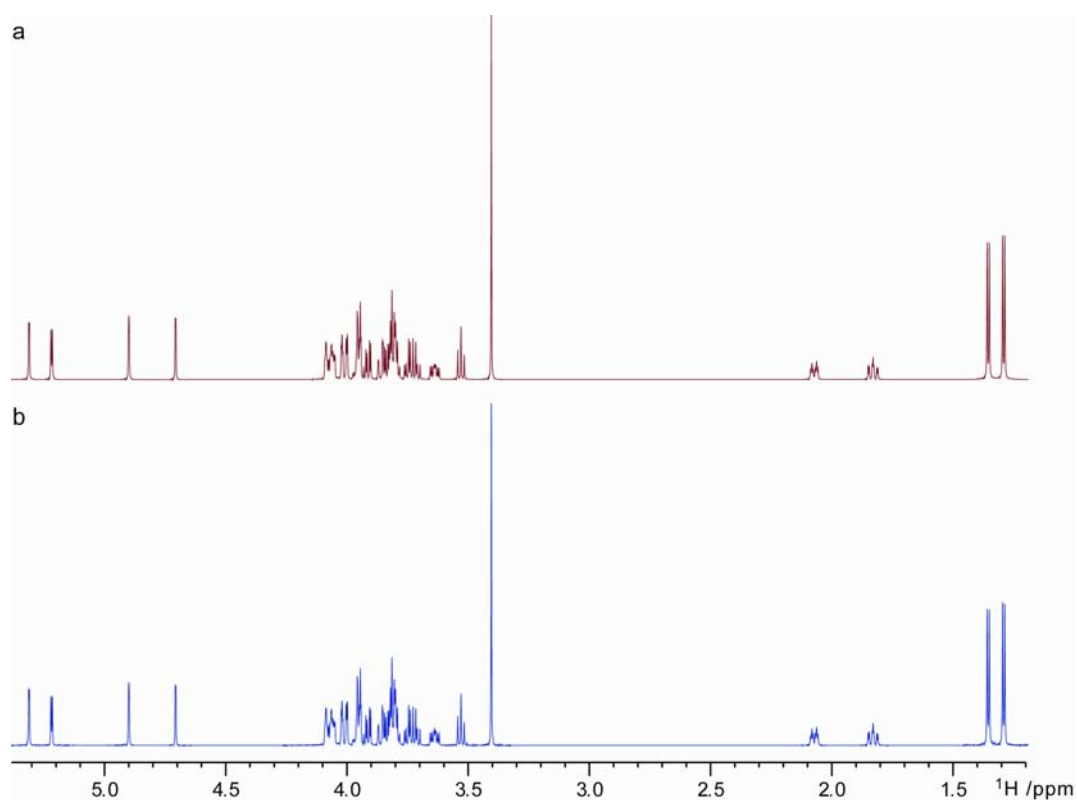

Figure S2.  $^1\text{H}$  NMR spectra at 700 MHz of tetrasaccharide **17** from (a) simulation using PERCH and (b) experiment (prepared for PERCH analysis, e.g. solvent peak removed).
